# Supplementary material for: NF-κB activation triggers NK-cell stimulation by monocyte-derived dendritic cells
Source: PubMed Central journal article supplement — Ther Adv Med Oncol. 2019 Dec 11;11:1758835919891622. doi: 10.1177/1758835919891622 (PMC6909276; doi:10.1177/1758835919891622), 2019-12-11
Supplement: Raw_data_used_for_this_manuscript_15.08.19.pdf [file Raw_data_used_for_this_manuscript_15.08.19.pdf]

## Raw data used for this manuscript

Supplemental table S1: Original data used for figure 1A

|                  |                   | DC : PBMC ratio <sup>1</sup> |          |           |                   |                    |
|------------------|-------------------|------------------------------|----------|-----------|-------------------|--------------------|
|                  |                   | CD54                         | Mock 1:2 | Mock 1:10 | calKK $\beta$ 1:2 | calKK $\beta$ 1:10 |
| 24h              | EXP1 <sup>2</sup> |                              | 0.6      | 0.8       | 0.9               | 1.2                |
|                  | EXP2              |                              | 1.0      | 1.3       | 2.9               | 2.5                |
|                  | EXP3              |                              | 1.6      | 1.6       | 3.6               | 2.7                |
|                  | EXP4              |                              | 2.4      | 1.8       | 4.8               | 6.9                |
| 48h              | EXP1              |                              | 1.0      | 1.0       | 1.2               | 1.5                |
|                  | EXP2              |                              | 1.3      | 1.5       | 3.4               | 2.2                |
|                  | EXP3              |                              | 1.4      | 1.1       | 3.5               | 2.5                |
|                  | EXP4              |                              | 2.0      | 1.7       | 5.3               | 4.8                |
|                  |                   | <b>CD69</b>                  |          |           |                   |                    |
| 24h              | EXP1              |                              | 2.3      | 1.3       | 7.6               | 3.4                |
|                  | EXP2              |                              | 2.0      | 1.5       | 5.9               | 2.5                |
|                  | EXP3              |                              | 2.1      | 1.5       | 5.3               | 2.6                |
|                  | EXP4              |                              | 2.6      | 1.3       | 8.4               | 5.1                |
| 48h              | EXP1              |                              | 2.3      | 1.3       | 7.1               | 3.6                |
|                  | EXP2              |                              | 2.1      | 1.2       | 8.5               | 2.9                |
|                  | EXP3              |                              | 2.8      | 1.4       | 10.5              | 3.5                |
|                  | EXP4              |                              | 2.8      | 1.7       | 8.8               | 4.3                |
|                  |                   | <b>CD25</b>                  |          |           |                   |                    |
| 24h              | EXP1              |                              | 1.2      | 1.1       | 3.1               | 2.3                |
|                  | EXP2              |                              | 1.9      | 0.7       | 2.4               | 1.3                |
|                  | EXP3              |                              | 1.3      | 1.3       | 3.5               | 1.9                |
|                  | EXP4              |                              | 2.2      | 1.7       | 9.3               | 7.7                |
| 48h              | EXP1              |                              | 1.5      | 1.2       | 7.4               | 2.1                |
|                  | EXP2              |                              | 1.6      | 1.5       | 5.2               | 2.2                |
|                  | EXP3              |                              | 1.5      | 1.2       | 3.7               | 1.9                |
|                  | EXP4              |                              | 1.7      | 1.5       | 5.2               | 2.5                |
|                  |                   |                              |          |           |                   |                    |
| Average          | CD54 24h          |                              | 1.4      | 1.4       | 3.0               | 3.3                |
|                  | CD54 48h          |                              | 1.4      | 1.3       | 3.3               | 2.7                |
|                  | CD69 24h          |                              | 2.3      | 1.4       | 6.8               | 3.4                |
|                  | CD69 48h          |                              | 2.5      | 1.4       | 8.7               | 3.6                |
|                  | CD25 24h          |                              | 1.6      | 1.2       | 4.6               | 3.3                |
|                  | CD25 48h          |                              | 1.6      | 1.4       | 5.3               | 2.2                |
|                  |                   |                              |          |           |                   |                    |
| SEM <sup>3</sup> | CD54 24h          |                              | 0.4      | 0.2       | 0.8               | 1.2                |
|                  | CD54 48h          |                              | 0.2      | 0.2       | 0.8               | 0.7                |
|                  | CD69 24h          |                              | 0.1      | 0.1       | 0.7               | 0.6                |
|                  | CD69 48h          |                              | 0.2      | 0.1       | 0.7               | 0.3                |
|                  | CD25 24h          |                              | 0.2      | 0.2       | 1.6               | 1.5                |
|                  | CD25 48h          |                              | 0.1      | 0.1       | 0.8               | 0.1                |

<sup>1</sup>Indicated is the fold induction (the surface marker expression of each condition was calculated relative to the MFI of PBMCs alone). <sup>2</sup>EXP=experiment. <sup>3</sup>SEM=standard error of the mean.

Supplemental table S2: Original data used for figure 1B

|                  |                   | DC : NK cell ratio <sup>1</sup> |          |          |                   |                   |
|------------------|-------------------|---------------------------------|----------|----------|-------------------|-------------------|
|                  |                   | CD54                            | Mock 5:1 | Mock 1:1 | calKK $\beta$ 5:1 | calKK $\beta$ 1:1 |
| 24h              | EXP1 <sup>2</sup> |                                 | 2.2      | 1.8      | 4.9               | 4.4               |
|                  | EXP2              |                                 | 2.1      | 1.5      | 6.3               | 6.0               |
|                  | EXP3              |                                 | 2.7      | 2.2      | 5.6               | 5.7               |
|                  | EXP4              |                                 | 2.2      | 2.0      | 3.9               | 4.8               |
| 48h              | EXP1              |                                 | 3.4      | 2.9      | 4.5               | 4.5               |
|                  | EXP2              |                                 | 1.5      | 1.4      | 4.4               | 3.6               |
|                  | EXP3              |                                 | 2.9      | 2.3      | 6.3               | 6.8               |
|                  | EXP4              |                                 | 2.8      | 2.2      | 3.9               | 4.2               |
|                  |                   | <b>CD69</b>                     |          |          |                   |                   |
| 24h              | EXP1              |                                 | 2.0      | 1.6      | 4.6               | 3.9               |
|                  | EXP2              |                                 | 2.3      | 1.5      | 7.6               | 6.1               |
|                  | EXP3              |                                 | 1.6      | 1.7      | 3.6               | 3.7               |
|                  | EXP4              |                                 | 1.6      | 2.1      | 5.9               | 5.6               |
| 48h              | EXP1              |                                 | 2.7      | 2.2      | 6.8               | 7.2               |
|                  | EXP2              |                                 | 1.6      | 1.3      | 3.4               | 3.7               |
|                  | EXP3              |                                 | 2.1      | 2.2      | 4.7               | 4.9               |
|                  | EXP4              |                                 | 2.5      | 2.5      | 10.1              | 9.1               |
|                  |                   | <b>CD25</b>                     |          |          |                   |                   |
| 24h              | EXP1              |                                 | 1.9      | 1.4      | 5.3               | 4.1               |
|                  | EXP2              |                                 | 2.2      | 1.4      | 6.8               | 5.2               |
|                  | EXP3              |                                 | 1.8      | 1.6      | 5.6               | 5.4               |
|                  | EXP4              |                                 | 1.4      | 1.3      | 6.3               | 5.4               |
| 48h              | EXP1              |                                 | 3.4      | 3.0      | 8.2               | 7.3               |
|                  | EXP2              |                                 | 1.5      | 1.3      | 4.3               | 3.8               |
|                  | EXP3              |                                 | 2.8      | 2.0      | 10.6              | 9.5               |
|                  | EXP4              |                                 | 2.3      | 1.4      | 12.3              | 9.6               |
|                  |                   |                                 |          |          |                   |                   |
| Average          | CD54 24h          |                                 | 2.3      | 1.9      | 5.2               | 5.2               |
|                  | CD54 48h          |                                 | 2.7      | 2.2      | 4.8               | 4.8               |
|                  | CD69 24h          |                                 | 1.9      | 1.7      | 5.4               | 4.8               |
|                  | CD69 48h          |                                 | 2.2      | 2.1      | 6.3               | 6.2               |
|                  | CD25 24h          |                                 | 1.8      | 1.4      | 6.0               | 5.0               |
|                  | CD25 48h          |                                 | 2.5      | 1.9      | 8.9               | 7.6               |
|                  |                   |                                 |          |          |                   |                   |
| SEM <sup>3</sup> | CD54 24h          |                                 | 0.1      | 0.2      | 0.5               | 0.4               |
|                  | CD54 48h          |                                 | 0.4      | 0.3      | 0.5               | 0.7               |
|                  | CD69 24h          |                                 | 0.2      | 0.1      | 0.9               | 0.6               |
|                  | CD69 48h          |                                 | 0.2      | 0.2      | 1.5               | 1.2               |
|                  | CD25 24h          |                                 | 0.2      | 0.1      | 0.3               | 0.3               |
|                  | CD25 48h          |                                 | 0.4      | 0.4      | 1.7               | 1.4               |

<sup>1</sup>Indicated is the fold induction (the surface marker expression of each condition was calculated relative to the MFI of NK cells alone). <sup>2</sup>EXP=experiment. <sup>3</sup>SEM=standard error of the mean.

**Supplemental table S3: Original data used for figure 2A**

|         |                               | DC : PBMC ratio <sup>1</sup> |           |          |           |                    |                   |                    |
|---------|-------------------------------|------------------------------|-----------|----------|-----------|--------------------|-------------------|--------------------|
|         | IL-12p70                      | PBMC only                    | Mock only | Mock 1:2 | Mock 1:10 | calKK $\beta$ only | calKK $\beta$ 1:2 | calKK $\beta$ 1:10 |
| 24h     | EXP1 <sup>2</sup>             | -0.62                        | -2.26     | -2.01    | 0.23      | 233.82             | 155.81            | 66.15              |
|         | EXP2                          | -2.38                        | -1.55     | -0.54    | -1.72     | 229.51             | 97.83             | 37.93              |
|         | EXP3                          | -2.18                        | -1.55     | -1.50    | -2.33     | 1352.88            | 984.09            | 311.48             |
|         | EXP4                          | -1.89                        | -0.71     | -0.76    | -0.70     | 340.25             | 363.15            | 36.59              |
|         | EXP5                          | -1.05                        | -1.69     | -1.29    | -1.16     | 72.13              | 61.97             | 10.64              |
|         | EXP6                          | -0.53                        | -1.46     | 0.16     | -0.79     | 330.06             | 152.09            | 56.82              |
|         | EXP7                          | -1.58                        | -1.56     | -1.46    | -0.80     | 771.98             | 787.97            | 352.20             |
| 48h     | EXP1                          | -2.51                        | -2.15     | -0.30    | -2.16     | 1365.78            | 1169.03           | 331.44             |
|         | EXP2                          | -0.56                        | -0.69     | -1.07    | -0.44     | 307.75             | 278.47            | 28.23              |
|         | EXP3                          | -0.67                        | -1.95     | -1.17    | -1.38     | 66.85              | 59.85             | 7.97               |
|         | EXP4                          | -0.19                        | -0.24     | 0.71     | -0.91     | 232.93             | 144.09            | 43.05              |
|         | <b>IFN<math>\gamma</math></b> |                              |           |          |           |                    |                   |                    |
| 24h     | EXP1                          | 31.48                        | -10.72    | -3.27    | -9.09     | 485.84             | 1747.20           | 722.18             |
|         | EXP2                          | -23.15                       | -9.37     | 232.92   | 21.72     | 889.33             | 5455.27           | 1834.92            |
|         | EXP3                          | 456.09                       | 32.59     | 81.53    | 5.13      | 331.97             | 4477.24           | 1020.97            |
|         | EXP4                          | -3.43                        | -18.20    | 32.72    | 14.87     | 190.23             | 9848.75           | 617.75             |
|         | EXP5                          | 29.90                        | 6.89      | 42.75    | 44.13     | 495.99             | 3127.76           | 808.98             |
|         | EXP6                          | 7.81                         | -5.09     | 41.25    | 23.31     | 92.10              | 2628.58           | 1727.04            |
|         | EXP7                          | 58.30                        | 17.32     | 66.16    | 38.49     | 777.83             | 28191.77          | 21163.67           |
| 48h     | EXP1                          | -7.96                        | -7.64     | 1976.32  | -0.94     | 274.60             | 9677.16           | 5833.13            |
|         | EXP2                          | -6.81                        | -4.07     | 57.44    | 7.34      | 2083.40            | 16811.56          | 2173.89            |
|         | EXP3                          | 13.13                        | 7.63      | 159.92   | 21.35     | 857.36             | 3801.04           | 2885.30            |
|         | EXP4                          | 12.68                        | 17.43     | 282.36   | 54.20     | 278.46             | 4303.85           | 3672.77            |
|         | <b>TNF<math>\alpha</math></b> |                              |           |          |           |                    |                   |                    |
| 24h     | EXP1                          | 4.80                         | 3.24      | 13.09    | 10.88     | 22.21              | 112.09            | 121.33             |
|         | EXP2                          | 3.44                         | 5.48      | 11.90    | 5.53      | 24.42              | 80.72             | 203.43             |
|         | EXP3                          | 2.14                         | 2.02      | 106.08   | 9.34      | 65.69              | 176.38            | 125.86             |
|         | EXP4                          | 5.79                         | 1.18      | 6.83     | 19.66     | 15.20              | 80.35             | 112.10             |
|         | EXP5                          | 7.60                         | 3.43      | 8.35     | 31.24     | 48.03              | 110.96            | 133.42             |
|         | EXP6                          | 120.20                       | 3.90      | 15.62    | 38.84     | 57.00              | 103.34            | 250.70             |
|         | EXP7                          | 13.60                        | -1.05     | 4.75     | 11.03     | 44.93              | 97.48             | 281.52             |
| 48h     | EXP1                          | -1.17                        | -0.58     | 7.11     | 1.69      | 26.62              | 33.50             | 45.69              |
|         | EXP2                          | 1.26                         | 1.31      | 2.71     | 1.67      | 12.02              | 22.34             | 16.44              |
|         | EXP3                          | 4.02                         | 2.30      | 6.25     | 8.05      | 15.38              | 20.62             | 35.71              |
|         | EXP4                          | 6.23                         | 1.78      | 4.98     | 6.94      | 18.29              | 23.88             | 94.22              |
| Average | IL-12p70 24h                  | -1.46                        | -1.54     | -1.06    | -1.04     | 475.81             | 371.85            | 124.54             |
|         | IL-12p70 48h                  | -0.98                        | -1.26     | -0.46    | -1.22     | 493.33             | 412.86            | 102.67             |
|         | IFN $\gamma$ 24h              | 79.57                        | 1.92      | 70.58    | 19.79     | 466.18             | 7925.22           | 3985.07            |
|         | IFN $\gamma$ 48h              | 2.76                         | 3.34      | 619.01   | 20.49     | 873.46             | 8648.40           | 3641.27            |
|         | TNF $\alpha$ 24h              | 22.51                        | 2.60      | 23.80    | 18.08     | 39.64              | 108.76            | 175.48             |
|         | TNF $\alpha$ 48h              | 2.58                         | 1.20      | 5.26     | 4.59      | 18.08              | 25.08             | 48.02              |

|                        |                  |       |      |        |       |        |         |         |
|------------------------|------------------|-------|------|--------|-------|--------|---------|---------|
| <b>SEM<sup>3</sup></b> | IL-12p70 24h     | 0.28  | 0.17 | 0.27   | 0.31  | 167.53 | 139.23  | 54.11   |
|                        | IL-12p70 48h     | 0.52  | 0.47 | 0.44   | 0.37  | 295.14 | 256.05  | 76.59   |
|                        | IFN $\gamma$ 24h | 63.54 | 6.80 | 28.87  | 6.95  | 110.36 | 3524.27 | 2868.90 |
|                        | IFN $\gamma$ 48h | 5.86  | 5.72 | 454.77 | 12.14 | 425.92 | 3028.58 | 792.15  |
|                        | TNF $\alpha$ 24h | 16.34 | 0.80 | 13.79  | 4.74  | 7.26   | 12.29   | 26.22   |
|                        | TNF $\alpha$ 48h | 1.61  | 0.63 | 0.96   | 1.70  | 3.12   | 2.88    | 16.55   |

<sup>1</sup>Indicated is the average cytokine concentration [pg/ml]. <sup>2</sup>EXP=experiment. <sup>3</sup>SEM=standard error of the mean.

**Supplemental table S4: Original data used for figure 2B**

|                               |                   | <b>DC : NK ratio<sup>1</sup></b> |                  |                 |                 |                                     |                                    |                                    |
|-------------------------------|-------------------|----------------------------------|------------------|-----------------|-----------------|-------------------------------------|------------------------------------|------------------------------------|
|                               | <b>IL-12p70</b>   | <b>NK only</b>                   | <b>Mock only</b> | <b>Mock 5:1</b> | <b>Mock 1:1</b> | <b>calKK<math>\beta</math> only</b> | <b>calKK<math>\beta</math> 5:1</b> | <b>calKK<math>\beta</math> 1:1</b> |
| <b>24h</b>                    | EXP1 <sup>2</sup> | 0.80                             | 0.03             | -0.02           | -0.13           | 132.72                              | 104.28                             | 170.36                             |
|                               | EXP2              | 0.05                             | 0.75             | 1.97            | -0.43           | 84.71                               | 103.19                             | 150.94                             |
|                               | EXP3              | -1.62                            | -1.91            | -2.26           | -2.19           | 257.26                              | 288.59                             | 599.22                             |
|                               | EXP4              | -2.76                            | -2.00            | -1.38           | -1.43           | 75.48                               | 126.82                             | 206.14                             |
|                               | EXP5              | -1.17                            | -0.07            | -1.86           | -1.63           | 737.26                              | 902.12                             | 1463.81                            |
| <b>48h</b>                    | EXP1              | -0.04                            | 0.22             | -0.25           | 0.57            | 138.61                              | 150.25                             | 194.96                             |
|                               | EXP2              | -1.50                            | -1.35            | -0.43           | -2.13           | 259.69                              | 318.98                             | 577.89                             |
|                               | EXP3              | -2.42                            | -2.86            | -1.90           | -0.62           | 78.32                               | 167.42                             | 262.82                             |
|                               | EXP4              | -2.04                            | -2.96            | -1.62           | -0.82           | 741.32                              | 1026.18                            | 1746.96                            |
| <b>IFN<math>\gamma</math></b> |                   |                                  |                  |                 |                 |                                     |                                    |                                    |
| <b>24h</b>                    | EXP1              | 25.45                            | -3.78            | 14.17           | 36.66           | 190.03                              | 2122.99                            | 12230.29                           |
|                               | EXP2              | 8.29                             | -6.99            | 1.96            | 15.77           | 65.97                               | 1152.30                            | 6145.85                            |
|                               | EXP3              | 21.13                            | 0.10             | -11.30          | 30.29           | 154.29                              | 3983.28                            | 30613.84                           |
|                               | EXP4              | 272.33                           | 2.08             | 48.17           | 149.59          | 259.61                              | 8020.44                            | 38891.01                           |
|                               | EXP5              | 407.75                           | 32.62            | 48.15           | 263.59          | 705.29                              | 17262.21                           | 62703.46                           |
| <b>48h</b>                    | EXP1              | 44.46                            | 17.85            | 14.11           | 33.26           | 391.20                              | 2396.53                            | 13242.23                           |
|                               | EXP2              | 26.14                            | 2.54             | 3.22            | 31.65           | 546.69                              | 8019.10                            | 39626.24                           |
|                               | EXP3              | 304.29                           | 30.01            | 110.34          | 312.70          | 970.00                              | 18317.92                           | 61664.08                           |
|                               | EXP4              | 385.94                           | 34.17            | 165.86          | 379.80          | 938.76                              | 24990.44                           | 81342.22                           |
| <b>TNF<math>\alpha</math></b> |                   |                                  |                  |                 |                 |                                     |                                    |                                    |
| <b>24h</b>                    | EXP1              | 5.82                             | 3.90             | 3.82            | 4.08            | 19.03                               | 19.85                              | 32.29                              |
|                               | EXP2              | 3.65                             | 1.48             | 0.94            | 0.35            | 19.54                               | 22.82                              | 41.07                              |
|                               | EXP3              | 14.67                            | 0.51             | 1.33            | 1.04            | 29.76                               | 33.60                              | 74.53                              |
|                               | EXP4              | 9.20                             | 4.40             | 5.50            | 0.19            | 18.01                               | 35.44                              | 29.00                              |
|                               | EXP5              | 34.18                            | 1.39             | 0.69            | 1.92            | 59.00                               | 72.14                              | 160.56                             |
| <b>48h</b>                    | EXP1              | 2.53                             | -0.31            | -0.28           | -0.46           | 5.71                                | 6.45                               | 12.06                              |
|                               | EXP2              | 1.44                             | 0.37             | 2.37            | 0.67            | 2.46                                | 15.18                              | 7.17                               |
|                               | EXP3              | 20.01                            | 0.58             | 2.29            | 5.17            | 16.79                               | 24.04                              | 82.65                              |
|                               | EXP4              | 8.84                             | -0.94            | -0.91           | 0.00            | 6.26                                | 25.35                              | 56.22                              |

|                        |                  |        |       |       |        |        |          |          |
|------------------------|------------------|--------|-------|-------|--------|--------|----------|----------|
|                        |                  |        |       |       |        |        |          |          |
| <b>Average</b>         | IL-12p70 24h     | -0.94  | -0.64 | -0.71 | -1.16  | 257.49 | 305.00   | 518.09   |
|                        | IL-12p70 48h     | -1.50  | -1.74 | -1.05 | -0.75  | 304.49 | 415.71   | 695.66   |
|                        | IFN $\gamma$ 24h | 146.99 | 4.81  | 20.23 | 99.18  | 275.04 | 6508.24  | 30116.89 |
|                        | IFN $\gamma$ 48h | 190.21 | 21.14 | 73.38 | 189.35 | 711.66 | 13431.00 | 48968.69 |
|                        | TNF $\alpha$ 24h | 13.50  | 2.34  | 2.46  | 1.52   | 29.07  | 36.77    | 67.49    |
|                        | TNF $\alpha$ 48h | 8.21   | -0.08 | 0.87  | 1.35   | 7.81   | 17.76    | 39.53    |
|                        |                  |        |       |       |        |        |          |          |
| <b>SEM<sup>3</sup></b> | IL-12p70 24h     | 0.63   | 0.56  | 0.77  | 0.38   | 124.24 | 153.23   | 250.40   |
|                        | IL-12p70 48h     | 0.52   | 0.75  | 0.42  | 0.55   | 150.42 | 206.99   | 360.23   |
|                        | IFN $\gamma$ 24h | 81.72  | 7.13  | 12.09 | 47.53  | 112.00 | 2934.51  | 10083.79 |
|                        | IFN $\gamma$ 48h | 91.05  | 7.10  | 39.11 | 91.62  | 143.82 | 5070.76  | 14642.63 |
|                        | TNF $\alpha$ 24h | 5.49   | 0.76  | 0.94  | 0.71   | 7.78   | 9.34     | 24.63    |
|                        | TNF $\alpha$ 48h | 4.26   | 0.35  | 0.85  | 1.30   | 3.11   | 4.39     | 18.12    |

<sup>1</sup>Indicated is the average cytokine concentration [pg/ml]. <sup>2</sup>EXP=experiment. <sup>3</sup>SEM=standard error of the mean.

**Supplemental table S5: Original data used for figure 3B**

|                        |                   | <b>Transwell<sup>1</sup></b> |           |              |              |
|------------------------|-------------------|------------------------------|-----------|--------------|--------------|
|                        | <b>CD54</b>       | <b>I<sup>2</sup></b>         | <b>II</b> | <b>III.1</b> | <b>III.2</b> |
|                        | EXP1 <sup>3</sup> | -                            | 4114.6    | 7284.6       | 11311.4      |
|                        | EXP2              | 3028.3                       | 3129.6    | 5194.8       | 8034.8       |
|                        | EXP3              | 2610.5                       | 3574.9    | 10805.9      | 7192.8       |
|                        | EXP4              | 1974.3                       | 2954.4    | 6263.7       | 20842.1      |
|                        | EXP5              | 3737.2                       | 6702.1    | 13447.1      | 21256.5      |
|                        | <b>CD69</b>       |                              |           |              |              |
|                        | EXP1              | -                            | 61.0      | 78.7         | 162.9        |
|                        | EXP2              | 33.3                         | 54.1      | 76.1         | 190.1        |
|                        | EXP3              | 29.7                         | 55.3      | 83.5         | 126.2        |
|                        | EXP4              | 67.7                         | 99.8      | 132.2        | 189.7        |
|                        | EXP5              | 31.7                         | 103.3     | 212.8        | 355.3        |
|                        | <b>CD25</b>       |                              |           |              |              |
|                        | EXP1              | -                            | 950.6     | 1056.3       | 3648.6       |
|                        | EXP2              | 1135.8                       | 1031.5    | 1243.9       | 4953.4       |
|                        | EXP3              | 893.6                        | 1158.2    | 1370.0       | 3299.4       |
|                        | EXP4              | 1166.5                       | 1486.5    | 1832.3       | 18644.9      |
|                        | EXP5              | 3248.3                       | 5282.7    | 7912.1       | 48440.2      |
|                        |                   |                              |           |              |              |
| <b>Average</b>         | CD54              | 2837.6                       | 4095.1    | 8599.2       | 13727.5      |
|                        | CD69              | 40.6                         | 74.7      | 116.7        | 204.8        |
|                        | CD25              | 1611.0                       | 1981.9    | 2682.9       | 15797.3      |
|                        |                   |                              |           |              |              |
| <b>SEM<sup>4</sup></b> | CD54              | 370.0                        | 681.9     | 1535.3       | 3068.0       |
|                        | CD69              | 9.1                          | 11.0      | 26.2         | 39.4         |
|                        | CD25              | 549.2                        | 830.3     | 1313.5       | 8645.9       |

<sup>1</sup>Indicated is the mean fluorescence intensity. <sup>2</sup>See Fig. 3A for detailed description. <sup>3</sup>EXP=experiment.

<sup>4</sup>SEM=standard error of the mean.

**Supplemental table S6: Original data used for figure 3C**

|                  |                   | Transwell <sup>1</sup> |         |          |
|------------------|-------------------|------------------------|---------|----------|
| IL-12p70         |                   | I <sup>2</sup>         | II      | III      |
|                  | EXP1 <sup>3</sup> | -                      | 567.03  | 516.99   |
|                  | EXP2              | 0.16                   | 206.08  | 257.94   |
|                  | EXP3              | -1.08                  | 327.49  | 304.06   |
|                  | EXP4              | -0.42                  | 111.22  | 130.27   |
|                  | EXP5              | -1.91                  | 943.86  | 849.22   |
| IFN $\gamma$     |                   |                        |         |          |
|                  | EXP1              | -                      | 808.65  | 11654.11 |
|                  | EXP2              | 11.69                  | 1296.23 | 9435.40  |
|                  | EXP3              | -15.62                 | 681.51  | 21756.85 |
|                  | EXP4              | 13.67                  | 1808.82 | 39835.22 |
|                  | EXP5              | 55.27                  | 1956.50 | 36764.38 |
| TNF $\alpha$     |                   |                        |         |          |
|                  | EXP1              | -                      | 43.43   | 85.64    |
|                  | EXP2              | -0.14                  | 9.76    | 23.65    |
|                  | EXP3              | 0.16                   | 5.75    | 23.35    |
|                  | EXP4              | -0.76                  | 20.15   | 49.19    |
|                  | EXP5              | -1.38                  | 21.92   | 38.89    |
| Average          |                   |                        |         |          |
|                  | IL-12p70          | -0.81                  | 431.14  | 411.70   |
|                  | IFN $\gamma$      | 16.25                  | 1310.34 | 23889.19 |
|                  | TNF $\alpha$      | -0.53                  | 20.20   | 44.14    |
| SEM <sup>4</sup> |                   |                        |         |          |
|                  | IL-12p70          | 0.44                   | 149.18  | 125.89   |
|                  | IFN $\gamma$      | 14.62                  | 256.25  | 6257.80  |
|                  | TNF $\alpha$      | 0.34                   | 6.56    | 11.46    |

<sup>1</sup>Indicated is the average cytokine concentration [pg/ml]. <sup>2</sup>See Fig. 3A for detailed description. <sup>3</sup>EXP=experiment. <sup>4</sup>SEM=standard error of the mean.

**Supplemental table S7: Original data used for figure 4A**

| Tetramer          | Mock + no peptide <sup>1</sup> | Mock + MeIA peptide | calKK $\beta$ + no peptide | calKK $\beta$ + MeIA peptide |
|-------------------|--------------------------------|---------------------|----------------------------|------------------------------|
| EXP1 <sup>2</sup> | 0.05                           | 0.23                | 0.04                       | 0.61                         |
| EXP2              | 0.05                           | 0.07                | 0.05                       | 0.52                         |
| EXP3              | 0.09                           | 0.16                | 0.22                       | 1.62                         |
| EXP4              | 0.04                           | 0.16                | 0.03                       | 0.26                         |
| Average           | 0.06                           | 0.16                | 0.09                       | 0.75                         |
| SEM <sup>3</sup>  | 0.01                           | 0.03                | 0.05                       | 0.30                         |

<sup>1</sup>Indicated are percentage of MeIA-specific CD8<sup>+</sup> T cells [%]. <sup>2</sup>EXP=experiment. <sup>3</sup>SEM=standard error of the mean

**Supplemental table S8: Original data used for figure 4B**

| <b>CD69</b>            | <b>Mock + no peptide<sup>1</sup></b> | <b>Mock + MeIA peptide</b> | <b>calKK<math>\beta</math> + no peptide</b> | <b>calKK<math>\beta</math> + MeIA peptide</b> |
|------------------------|--------------------------------------|----------------------------|---------------------------------------------|-----------------------------------------------|
| EXP1 <sup>2</sup>      | 7809.78                              | 7784.73                    | 15344.13                                    | 13736.74                                      |
| EXP2                   | 610.59                               | 590.92                     | 14314.50                                    | 14136.72                                      |
| EXP3                   | 512.99                               | 453.33                     | 12849.25                                    | 12488.35                                      |
| EXP4                   | 639.92                               | 734.09                     | 8226.75                                     | 8869.02                                       |
| <b>Average</b>         | 2393.32                              | 2390.77                    | 12683.66                                    | 12307.71                                      |
| <b>SEM<sup>3</sup></b> | 1805.69                              | 1798.90                    | 1571.34                                     | 1198.77                                       |

<sup>1</sup>Indicated is the average mean fluorescence intensity. <sup>2</sup>EXP=experiment. <sup>3</sup>SEM=standard error of the mean

**Supplemental table S9: Original data used for figure 5A**

| <b>tumor : cell ratio</b> |                   | <b>DC : PBMC ratio<sup>1</sup></b> |                  |                                    |                                     |
|---------------------------|-------------------|------------------------------------|------------------|------------------------------------|-------------------------------------|
|                           |                   | <b>Mock 1:2</b>                    | <b>Mock 1:10</b> | <b>calKK<math>\beta</math> 1:2</b> | <b>calKK<math>\beta</math> 1:10</b> |
| <b>1:20</b>               | EXP1 <sup>2</sup> | 5.5                                | 6.8              | 28.0                               | 41.5                                |
|                           | EXP2              | 2.4                                | 1.6              | 41.9                               | 48.3                                |
|                           | EXP3              | 12.4                               | 4.1              | 20.1                               | 41.7                                |
| <b>1:6</b>                | EXP1              | 3.4                                | 2.2              | 10.7                               | 16.0                                |
|                           | EXP2              | 1.8                                | -0.9             | 28.7                               | 38.2                                |
|                           | EXP3              | 1.1                                | -1.1             | 8.4                                | 37.5                                |
| <b>1:2</b>                | EXP1              | 0.5                                | -0.2             | 4.6                                | 5.8                                 |
|                           | EXP2              | -0.2                               | 0.4              | 14.0                               | 17.7                                |
|                           | EXP3              | 1.8                                | 1.8              | 3.9                                | 12.4                                |
| <b>3:2</b>                | EXP1              | 2.3                                | 1.3              | 2.5                                | 3.1                                 |
|                           | EXP2              | -0.3                               | 0.6              | 4.5                                | 4.7                                 |
|                           | EXP3              | 1.1                                | -1.5             | 0.4                                | 5.3                                 |
| <b>Average</b>            | 1:20              | 6.8                                | 4.2              | 30.0                               | 43.8                                |
|                           | 1:6               | 2.1                                | 0.1              | 15.9                               | 30.6                                |
|                           | 1:2               | 0.7                                | 0.7              | 7.5                                | 12.0                                |
|                           | 3:2               | 1.1                                | 0.1              | 2.5                                | 4.3                                 |
| <b>SEM<sup>3</sup></b>    | 1:20              | 3.0                                | 1.5              | 6.4                                | 2.2                                 |
|                           | 1:6               | 0.7                                | 1.1              | 6.4                                | 7.3                                 |
|                           | 1:2               | 0.6                                | 0.6              | 3.2                                | 3.4                                 |
|                           | 3:2               | 0.8                                | 0.8              | 1.2                                | 0.7                                 |

<sup>1</sup>Indicated are relative lysis in [%]. <sup>2</sup>EXP=experiment. <sup>3</sup>SEM=standard error of the mean.

Supplemental table S10: Original data used for figure 5B

| tumor : cell ratio     |                   | DC : NK cell ratio <sup>1</sup> |          |                   |                   |
|------------------------|-------------------|---------------------------------|----------|-------------------|-------------------|
|                        |                   | Mock 5:1                        | Mock 1:1 | calKK $\beta$ 5:1 | calKK $\beta$ 1:1 |
| 1:20                   | EXP1 <sup>2</sup> | 1.6                             | -1.6     | 18.1              | 34.7              |
|                        | EXP2              | 1.7                             | -4.2     | 27.9              | 33.1              |
|                        | EXP3              | 6.6                             | 6.6      | 18.8              | 35.7              |
| 1:6                    | EXP1              | 1.3                             | -3.2     | 9.5               | 16.2              |
|                        | EXP2              | -5.4                            | -6.2     | 28.9              | 25.8              |
|                        | EXP3              | -0.9                            | -1.9     | 7.5               | 4.7               |
| 1:2                    | EXP1              | -2.9                            | 0.6      | 3.5               | 10.8              |
|                        | EXP2              | -6.5                            | -8.1     | 12.7              | 13.7              |
|                        | EXP3              | -0.9                            | -5.6     | 13.1              | 3.8               |
| 3:2                    | EXP1              | -1.0                            | -1.9     | 2.9               | 4.5               |
|                        | EXP2              | -3.7                            | -4.4     | 1.0               | 8.9               |
|                        | EXP3              | 4.7                             | 2.8      | 2.8               | 10.3              |
| <b>Average</b>         |                   |                                 |          |                   |                   |
| Average                | 1:20              | 3.3                             | 0.3      | 21.6              | 34.5              |
|                        | 1:6               | -1.7                            | -3.8     | 15.3              | 15.6              |
|                        | 1:2               | -3.4                            | -4.4     | 9.8               | 9.4               |
|                        | 3:2               | 0.0                             | -1.2     | 2.2               | 7.9               |
| <b>SEM<sup>3</sup></b> |                   |                                 |          |                   |                   |
| SEM <sup>3</sup>       | 1:20              | 1.6                             | 3.2      | 3.2               | 0.8               |
|                        | 1:6               | 2.0                             | 1.3      | 6.8               | 6.1               |
|                        | 1:2               | 1.6                             | 2.6      | 3.1               | 3.0               |
|                        | 3:2               | 2.5                             | 2.1      | 0.6               | 1.8               |

<sup>1</sup>Indicated are relative lysis in [%]. <sup>2</sup>EXP=experiment. <sup>3</sup>SEM=standard error of the mean.

**Supplemental table S11: Original data used for Supplemental figure S5**

|                        |                   | DC : NK ratio <sup>1</sup> |          |          |                   |                   |
|------------------------|-------------------|----------------------------|----------|----------|-------------------|-------------------|
|                        |                   | CD54                       | Mock 5:1 | Mock 1:1 | calKK $\beta$ 5:1 | calKK $\beta$ 1:1 |
|                        | EXP1 <sup>2</sup> | 3496.4                     | 3223.8   | 11829.9  | 12805.3           |                   |
|                        | EXP2              | 5183.1                     | 2504.5   | 27567.2  | 21678.6           |                   |
|                        | EXP3              | 8332.4                     | 3195.5   | 9274.2   | 10782.8           |                   |
|                        | EXP4              | 12128.8                    | 6528.6   | 15702.7  | 25958.5           |                   |
|                        |                   | <b>CD69</b>                |          |          |                   |                   |
|                        | EXP1              | 422.7                      | 297.0    | 1178.4   | 1187.9            |                   |
|                        | EXP2              | 101.0                      | 49.3     | 146.5    | 182.2             |                   |
|                        | EXP3              | 152.8                      | 111.2    | 79.2     | 87.1              |                   |
|                        | EXP4              | 254.2                      | 178.8    | 189.0    | 348.9             |                   |
|                        |                   | <b>CD25</b>                |          |          |                   |                   |
|                        | EXP1              | 4118.4                     | 3145.6   | 7670.0   | 6326.8            |                   |
|                        | EXP2              | 4202.6                     | 1980.2   | 45049.1  | 22177.4           |                   |
|                        | EXP3              | 5155.6                     | 2749.6   | 7803.9   | 6894.9            |                   |
|                        | EXP4              | 23356.1                    | 9008.1   | 102602.1 | 85940.0           |                   |
|                        |                   |                            |          |          |                   |                   |
| <b>Average</b>         | CD54              | 7285.2                     | 3863.1   | 16093.5  | 17806.3           |                   |
|                        | CD69              | 232.7                      | 159.1    | 398.3    | 451.5             |                   |
|                        | CD25              | 9208.2                     | 4220.9   | 40781.3  | 30334.8           |                   |
|                        |                   |                            |          |          |                   |                   |
| <b>SEM<sup>3</sup></b> | CD54              | 1900.2                     | 903.9    | 4046.4   | 3603.1            |                   |
|                        | CD69              | 35.8                       | 23.9     | 38.8     | 92.6              |                   |
|                        | CD25              | 4721.8                     | 1614.0   | 22405.1  | 18895.1           |                   |

<sup>1</sup>Indicated is the average mean fluorescence intensity. <sup>2</sup>EXP=experiment. <sup>3</sup>SEM=standard error of the mean.
